# Supplementary material for: International variation in neighborhood walkability, transit, and recreation environments using geographic information systems: the IPEN adult study
Source: PubMed Central journal article supplement (PMC4221715; doi:10.1186/1476-072x-13-43), 2014-10-25
Supplement: 12942_2014_609_MOESM4_ESM.pdf [file 12942_2014_609_MOESM4_ESM.pdf]

Additional file 4: Net residential density (dwellings per km<sup>2</sup>) for participants' 500m network buffers across cities and countries.

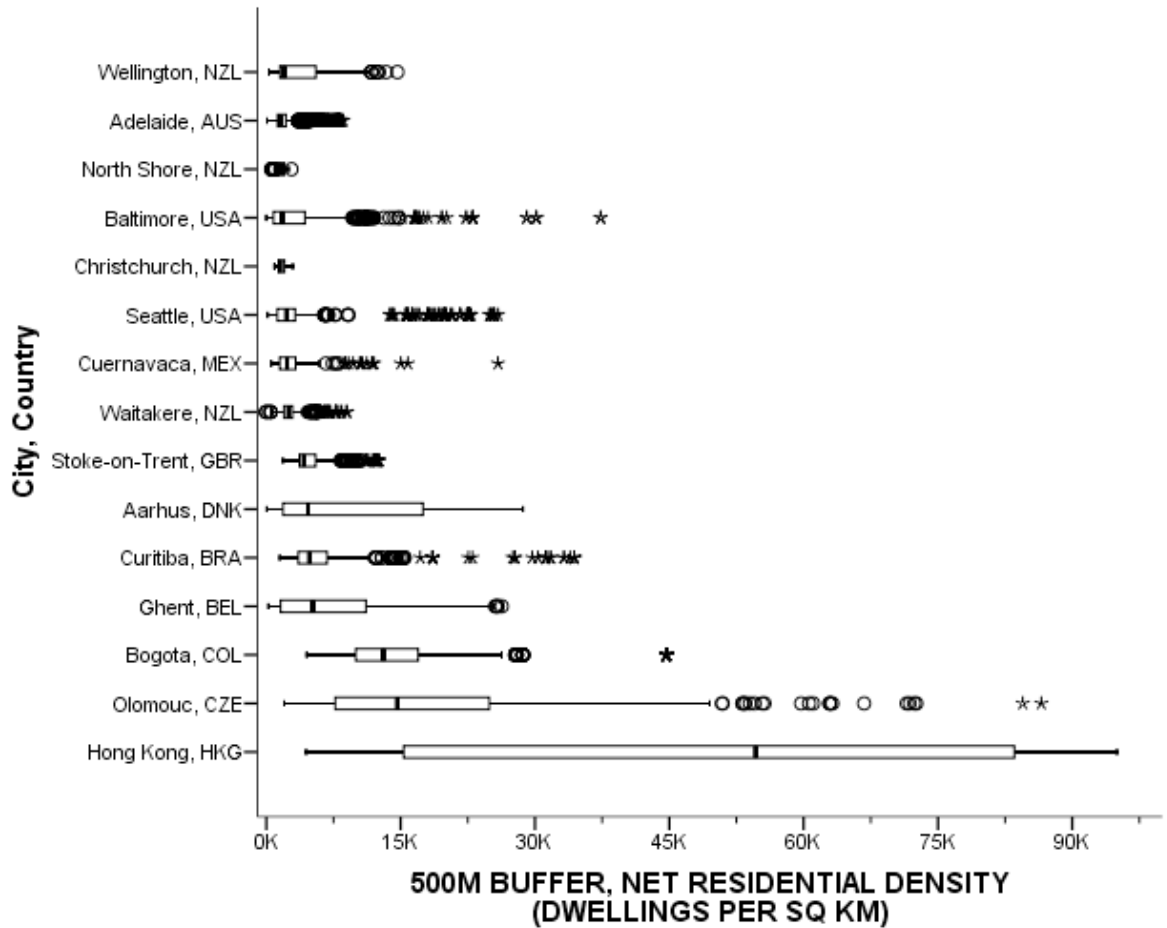

Circles are outliers that extend past the whiskers and asterisks represent extreme outliers defined as values greater than three times the length of the interquartile range.
