# Supplementary material for: International variation in neighborhood walkability, transit, and recreation environments using geographic information systems: the IPEN adult study
Source: PubMed Central journal article supplement (PMC4221715; doi:10.1186/1476-072x-13-43), 2014-10-25
Supplement: 12942_2014_609_MOESM7_ESM.pdf [file 12942_2014_609_MOESM7_ESM.pdf]

Additional file 7: Walkability scores across cities and countries within participants' 500m network buffer.

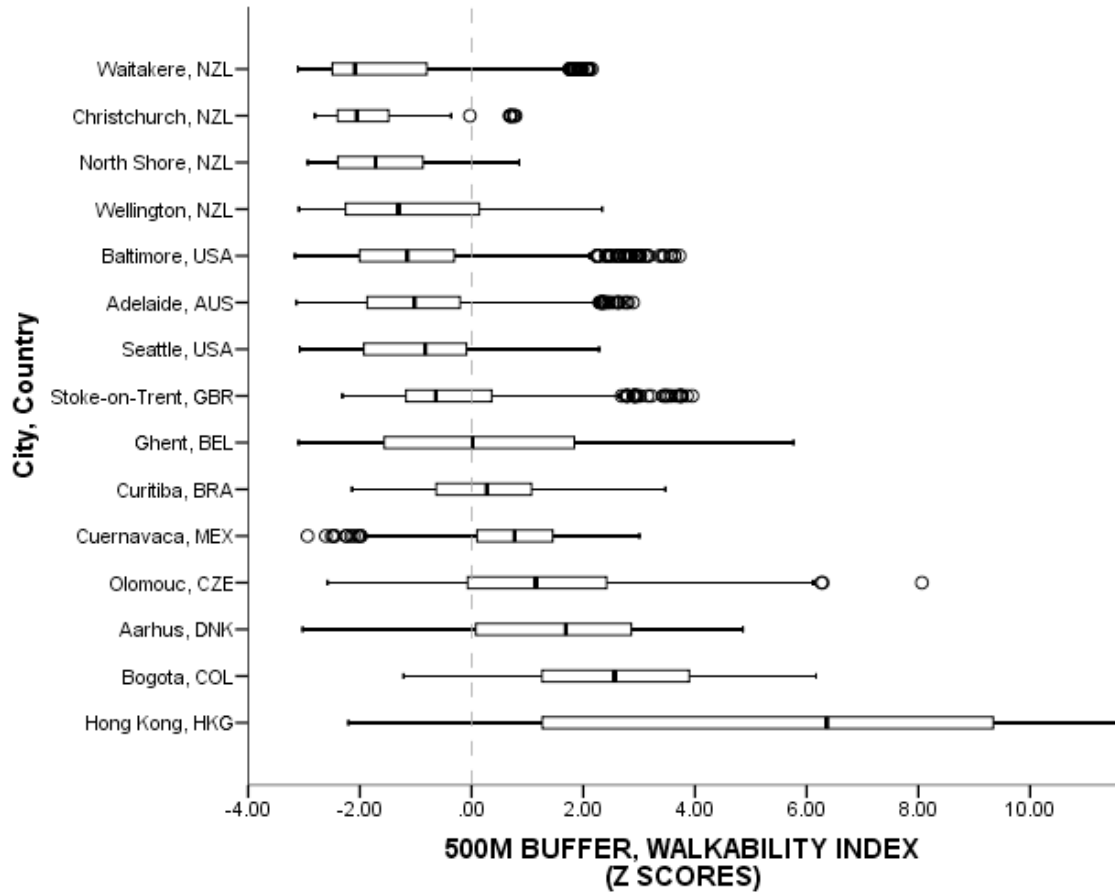

<sup>1</sup>Circles are outliers that extend past the whiskers and asterisks represent extreme outliers defined as values greater than three times the length of the interquartile range. <sup>2</sup>Walkability z-score equaled the sum of z-scores for residential density, land use mix, and intersection density. Z-scores allowed for standardized pooled standard deviations necessary for comparisons across countries.
